# Supplementary material for: A compact CLIP model: predicting spectral properties of AgNCs using a DNA template
Source: Royal Society of Chemistry journal article supplement (doi:10.1039/d4tc05228e), 2025-01-01
Supplement: d4tc05228e1.pdf [file d4tc05228e1.pdf]

## Supporting Information

### Compact CLIP Model: Predicting Spectral Properties of AgNCs Using DNA Template

Xun Zhang<sup>‡a</sup>, Huiting Wang<sup>‡b</sup>, Xin Liu<sup>a</sup>, Xiaokang Zhang<sup>a</sup>, Shuang Cui<sup>a</sup>, Yao Yao<sup>a</sup>, Bin Wang<sup>c</sup> and Qiang Zhang<sup>a\*</sup>

<sup>a</sup> School of Computer Science and Technology, Dalian University of Technology, Dalian 116024, China

<sup>b</sup> Allied Health Department, Osaka University, Osaka, 565-0871, Japan.

<sup>c</sup> Key Laboratory of Advanced Design and Intelligent Computing, Dalian University, Dalian, 116622, China.

‡ These authors contribute equally to this work

Correspondence: zhangq@dlut.edu.cn (Q.Z.); Tel: +86 0411 87402106;

*Contents:*

**Table S1.** DNA Sequences Design and Modifications

**Table S2.** DNA Sequences information for the AgNCs database

**Table S3.** The prediction accuracy of the compact CLIP model under different batch sizes

**Table S4.** The prediction accuracy of the compact CLIP model under different test set split ratios

**Table S5.** Comparison of the prediction accuracy of the spectral properties of AgNCs

**Figure S1.** Eliminate the background noise fluorescence caused by the sample plate

**Figure S2.** The relationship between the proportion of bases in the DNA template and the position of fluorescence peaks

**Figure S3.** Real-time fluorescence data of single-layer molecular perceptron with different weight parameters

**Table S1. DNA Sequences information for dsDNA and ssDNA research**

The DNA template sequence information required for the study of the impact of spectral signals on ssDNA and dsDNA sections is as follows. The black part represents the double-stranded sequence, and the red part represents the overhang region sequence.

| Oligonucleotides | Sequences (5'-3')                                                                                              |
|------------------|----------------------------------------------------------------------------------------------------------------|
| Ds-Base:         | GTCAGTACTTGAAGACTAAACCCCTAATTCCCC<br>CCCCCTTAATCCCCAA TAGTCTTCAAGTACTGAC                                       |
| DS-Base-23nt     | GTCAGTACTTGAAGATCAGTCTAAACCCCTAATT<br>CCCC<br>CCCCCTTAATCCCCAA TAGACTGATCTTCAAGTA<br>CTGAC                     |
| DS-Base-28nt     | GTCAGTACTTGAAGATCAGTCTAAACCCCTAATT<br>CCCC<br>CCCCCTTAATCCCCAA TAGACTGATCTTCAAGTA<br>CTGAC                     |
| DS-Base-33nt     | GTCAGAGTTCTACTTACGTAGAAGATCAGTCTAA<br>CCCCCTAATTCCCC<br>CCCCCTTAATCCCCAA TAGACTGATCTTCTACGT<br>AAGTAGAACTCTGAC |
| Ss-5'-0nt        | GTCAGTACTTGAAGACTAAACCCCTAATTCCCC<br>TAGTCTTCAAGTACTGAC                                                        |
| Ss-5'-2nt        | GTCAGTACTTGAAGACTAAACCCCTAATTCCCC<br>AATAGTCTTCAAGTACTGAC                                                      |
| Ss-5'-7nt        | GTCAGTACTTGAAGACTAAACCCCTAATTCCCC<br>CCCCAA TAGTCTTCAAGTACTGAC                                                 |
| Ss-5'-12nt       | GTCAGTACTTGAAGACTAAACCCCTAATTCCCC<br>TTAATCCCCAA TAGTCTTCAAGTACTGAC                                            |
| Ss-3'-0nt        | GTCAGTACTTGAAGACTA<br>CCCCCTTAATCCCCAA TAGTCTTCAAGTACTGAC                                                      |
| Ss-3'-2nt        | GTCAGTACTTGAAGACTAAA<br>CCCCCTTAATCCCCAA TAGTCTTCAAGTACTGAC                                                    |
| Ss-3'-7nt        | GTCAGTACTTGAAGACTAAACCC<br>CCCCCTTAATCCCCAA TAGTCTTCAAGTACTGAC                                                 |
| Ss-3'-12nt       | GTCAGTACTTGAAGACTAAACCCCTAATT<br>CCCCCTTAATCCCCAA TAGTCTTCAAGTACTGAC                                           |

**Table S2. DNA Sequences information for the AgNCs database**

*DNA Template of AgNCs:*

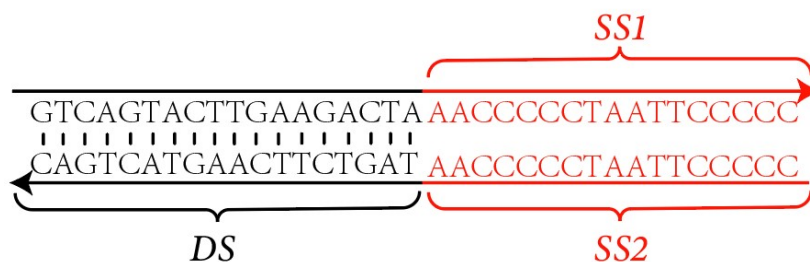

Maintain the DNA double-stranded sequence as “GTCAGTACTTGAAGACTA-TAGTCTTCAAGTACTGAC” unchanged, and alter the sequence information of SS1 and SS2 in the FW1-62 group sequences to conduct orthogonal experiments. The fluorescence heatmap and data between the DNA text sequences can be referred to in the database on GitHub.

| Oligonucleotides | Sequences (5 '-3 ')  |
|------------------|----------------------|
| FW1              | CCCCCCCCCCCCCCCC     |
| FW2              | CACCCCCCCCCCCCCGTC   |
| FW3              | GCATTATCCCCACCCCTCCC |
| FW4              | TTATCAGCGCCTCGACCTTA |
| FW5              | CGCTTCACTATGCGCTTATA |
| FW6              | TCTATACTCAGGCGTCGAGT |
| FW7              | AGCTAATCGCGAGGGGACCG |
| FW8              | ATTGAAGTTCGGATGCACCG |
| FW9              | GCTCACTTTTTTGTATTGTA |
| FW10             | TATATGGGTTAATTTTTGGA |
| FW11             | CCCCCCCCCCCCCCCC     |
| FW12             | ATCCCCCCCCCCCCCCCC   |
| FW13             | CCTCCCCCAGGACCCC     |
| FW14             | AACCCCCTAATTCCCCC    |
| FW15             | ATCGCCAGGCTACCCTA    |
| FW16             | CCTCAAATGCTCCTGG     |
| FW17             | TGCCCGAAAGTTAGACC    |
| FW18             | GAGTACCAATTGCTCAT    |
| FW19             | AGATTTGTAAATTAGCG    |

---

|      |                   |
|------|-------------------|
| FW20 | AGATGTATTGATTATTA |
| FW21 | CCCCCCCCCCCCCCCC  |
| FW22 | CTACCCCCCCCCCCCC  |
| FW23 | ATGCCCTCCCTTGCCC  |
| FW24 | CTCTACGCCGCAGCGA  |
| FW25 | CAGCGGAGAGCGACCC  |
| FW26 | TCTCTTCCGCAAATTT  |
| FW27 | AGAGACCACAATGTGC  |
| FW28 | TATCGCGAGGGCAAGT  |
| FW29 | CCCAGGATGTTGATAG  |
| FW30 | ATGAGAGATATGAGAT  |
| FW31 | CCCCCCCCCCCCCCCC  |
| FW32 | GGGCCCTACCCCCC    |
| FW33 | CCTTATCCCTACCTG   |
| FW34 | TCCAGAATTCCCAGT   |
| FW35 | TCATTAACCGGCATC   |
| FW36 | GGTAGTTCCACATA    |
| FW37 | GCGGTTCCGTTTGCT   |
| FW38 | AGTGTTTCCTTAGAC   |
| FW39 | GGTGGTGCGGTTCTG   |
| FW40 | AAAGTTGGGATTGTA   |
| FW41 | CCCCCCCCCCCC      |
| FW42 | AACCCGCCCCCC      |
| FW43 | TACCCTTGCCT       |
| FW44 | CAGGTAGCACAA      |
| FW45 | AATTCAGCTCT       |
| FW46 | TGGTACATTTGT      |
| FW47 | TTAAGCCGTGAG      |
| FW48 | GCCTCAGGAAAG      |
| FW49 | GGGTTGTTTCATC     |
| FW50 | ATAGTTTGGTAA      |

---

---

|      |             |
|------|-------------|
| FW51 | GTACGTTAGCC |
| FW52 | GGGCACCTAG  |
| FW53 | CAAAGATGC   |
| FW54 | GTCGGCGC    |
| FW55 | TGACTAG     |
| FW56 | TCTGTT      |
| FW57 | TAGGT       |
| FW58 | TGGC        |
| FW59 | CCG         |
| FW60 | TG          |
| FW61 | T           |
| FW62 | Null        |

---

**Table S3. The prediction accuracy of the compact CLIP model under different batch sizes**

| Batch size | Training loss | Training accuracy | Test loss | Test accuracy | Random | Multiplication factor |
|------------|---------------|-------------------|-----------|---------------|--------|-----------------------|
| 8          | 0.0631        | 0.9740            | 0.1634    | 0.7298        | 0.0470 | 15.53                 |
| 16         | 0.0711        | 0.9671            | 0.1450    | 0.5766        | 0.0330 | 17.47                 |
| 32         | 0.0887        | 0.9586            | 0.1128    | 0.4485        | 0.0282 | 15.90                 |
| 64         | 0.1347        | 0.9394            | 0.0828    | 0.3370        | 0.0292 | 11.54                 |

For the method of using 32 samples as a batch, we have supplemented gradient tests for batch size, testing batch sizes of 8, 16, 32, and 64. The results obtained have been filled into Supplementary Material Table S3, as shown in the table below. As long as the batch size is controlled within the range of 8-32, the accuracy has increased by more than 15 times compared to random prediction (Multiplication factor).

**Table S4. The prediction accuracy of the compact CLIP model under different test set split ratios**

| The size ratio of test and train set | Training loss | Training accuracy | Test loss | Test accuracy | Peak position accuracy | Peak intensity accuracy |
|--------------------------------------|---------------|-------------------|-----------|---------------|------------------------|-------------------------|
| 1:9                                  | 0.0887        | 0.9586            | 0.1128    | 0.4485        | 0.80                   | 0.68                    |
| 2:8                                  | 0.0802        | 0.9490            | 0.1306    | 0.4209        | 0.80                   | 0.67                    |
| 3:7                                  | 0.0779        | 0.9450            | 0.1320    | 0.4197        | 0.73                   | 0.67                    |

Regarding the proportion of the test set, we have also supplemented gradient tests. We tested the compact CLIP model with test-to-training set ratios of 1:9, 2:8, and 3:7. The accuracy results obtained have been filled into Supplementary Material Table S4, as shown in the table below. It can be observed that by changing the proportions of the test and training sets, the precision of our spectral peak and fluorescence intensity predictions did not change significantly. To further improve precision, we may need to establish data standardization methods between different fluorescence databases in the future to expand the scale of the database and address this issue.

**Table S5. Comparison of the prediction accuracy of the spectral properties of AgNCs**

| Model        | Prediction Results             |                         |
|--------------|--------------------------------|-------------------------|
|              | Peak position accuracy (color) | Peak intensity accuracy |
| Compact CLIP | 0.68                           | 0.80                    |
| RNN          | 0.56                           | /                       |
| SVM          | /                              | 0.80                    |
| MERCI        | 0.90                           | /                       |

We reviewed relevant papers on the prediction of AgNCs spectra and compared our compact CLIP model with RNN<sup>[1]</sup>, SVM<sup>[2]</sup>, and MERCI<sup>[3]</sup>. Unlike traditional classification of AgNCs spectra based on color and fluorescence intensity, the advantage of compact CLIP lies in its ability to simultaneously predict the numerical values of fluorescence peak positions and intensities, achieving relatively good accuracy.

[1] Zhai, F., Guan, Y., Li, Y., Chen, S., & He, R. Predicting the fluorescence properties of hairpin-DNA-templated silver nanoclusters via deep learning. *ACS Applied Nano Materials*.2022, 5(7), 9615-9624.

[2] Copp, S. M., Bogdanov, P., Debord, M., Singh, A., & Gwinn, E. Base motif recognition and design of DNA templates for fluorescent silver clusters by machine learning. *Advanced Materials*. 2014, (33), 5839-5845.

[3] Copp, S. M., Gorovits, A., Swasey, S. M., Gudibandi, S., Bogdanov, P., & Gwinn, E. G. Fluorescence color by data-driven design of genomic silver clusters. *ACS nano*. 2018, 12(8), 8240-8247.



**Figure S1.** Eliminate the background noise fluorescence caused by the sample plate

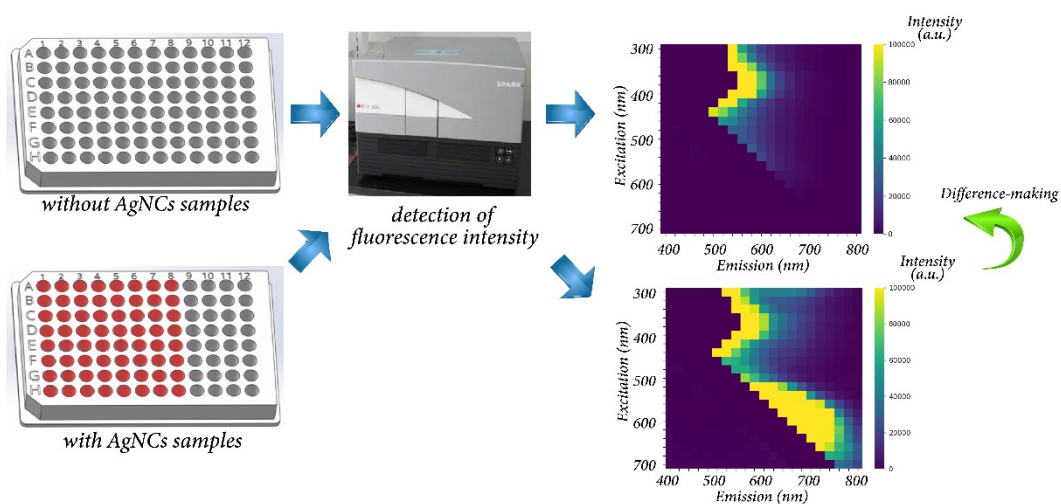

We use a 96-well sample plate as a carrier and often encounter background noise when using a Tecan microplate reader. To obtain spectral signals that are solely produced by the samples themselves, we employ a differential method to process the data. Specifically, we subtract the fluorescence of the sample plate containing buffer solution from the fluorescence of the sample plate containing AgNCs. The final difference is used as the spectral data collected from our samples.

**Figure S2.** The relationship between the proportion of bases in the DNA template and the position of fluorescence peaks

3D Scatter: Excitation vs Emission vs A Proportion

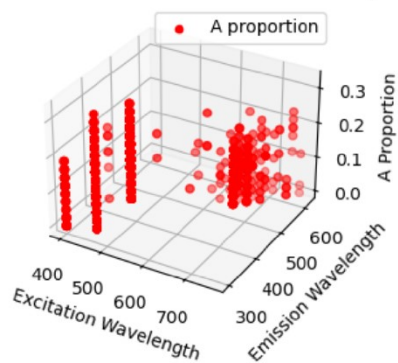

3D Scatter: Excitation vs Emission vs C Proportion

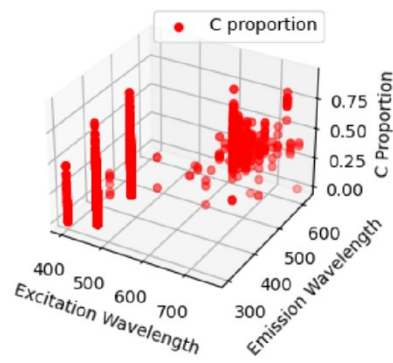

3D Scatter: Excitation vs Emission vs G Proportion

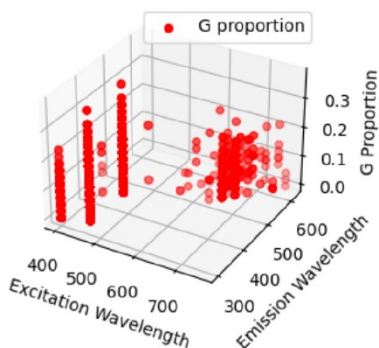

3D Scatter: Excitation vs Emission vs T Proportion

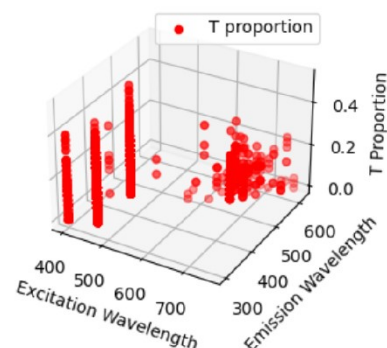

Plotting the EM-EX positions of the fluorescence peaks and the proportions of the four bases from 3844 sets of data in a 3D scatter plot reveals no apparent relationship between the base proportions and the peak positions.

**Figure S3.** Confusion matrix of the compact CLIP model

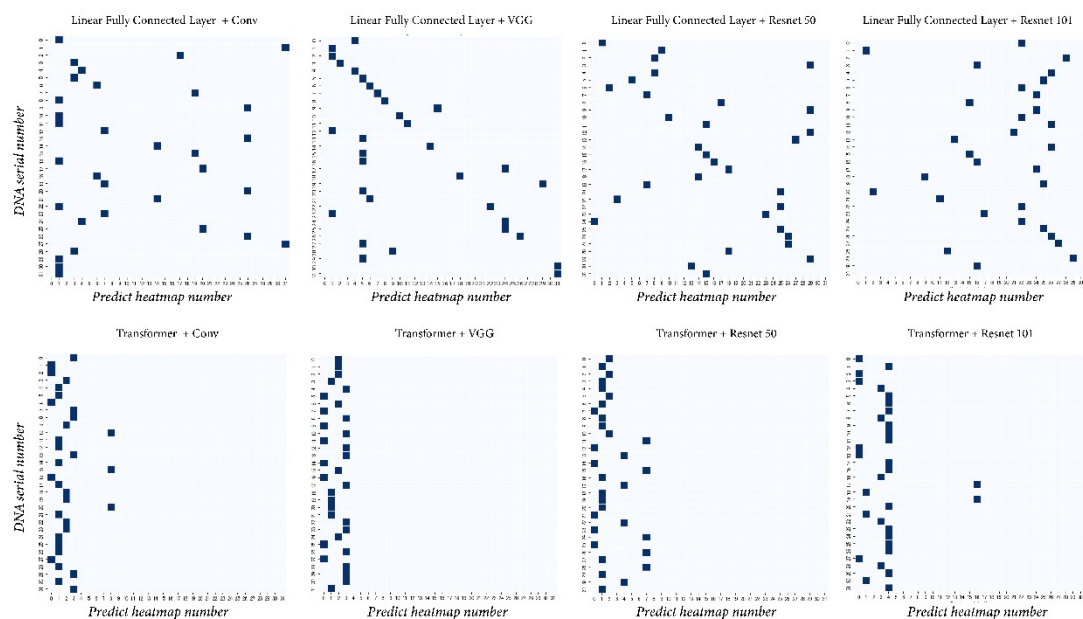

In the compact CLIP model, the use of a linear fully connected layer for the text encoder outperforms the transformer in prediction accuracy, showing a significant improvement in accuracy on the test set, with most predicted points distributed along the main diagonal of the confusion matrix. The primary reason might be that the DNA sequence texts and fluorescence heatmaps in the AgNCs database we used are not complex, so the attention mechanism carried by the transformer does not bring significant performance improvement. On the contrary, its large hyperparameter space may reduce the model's learning ability.
